# Supplementary material for: SV40 miR-S1 and Cellular miR-1266 Sequester Each Other from Their Targets, Enhancing Telomerase Activity and Viral Replication
Source: MDPI journal article supplement (doi:10.3390/ncrna8040057), 2022-07-28
Supplement: s1 [file s1]

|                                                                                            |                      |  |  |                                                                 |  |  |  |  |  |  |  |  |
|--------------------------------------------------------------------------------------------|----------------------|--|--|-----------------------------------------------------------------|--|--|--|--|--|--|--|--|
|                                                                                            |                      |  |  |                                                                 |  |  |  |  |  |  |  |  |
| <b>Table S1. Primers for Reverse transcription, RT-qPCR, and RT-PCR used in this study</b> |                      |  |  |                                                                 |  |  |  |  |  |  |  |  |
|                                                                                            | Name                 |  |  | Sequence (5' to 3')                                             |  |  |  |  |  |  |  |  |
|                                                                                            |                      |  |  |                                                                 |  |  |  |  |  |  |  |  |
| <b><i>Reverse transcription for miR RT-qPCR</i></b>                                        |                      |  |  |                                                                 |  |  |  |  |  |  |  |  |
|                                                                                            |                      |  |  |                                                                 |  |  |  |  |  |  |  |  |
|                                                                                            | Anchor RT primer 1 * |  |  | CGACTCGATCCAGTCTCAGGGTCCGAGGTATTCGATCGAGTCGCACTTTTTTTTTT<br>TTA |  |  |  |  |  |  |  |  |
|                                                                                            |                      |  |  |                                                                 |  |  |  |  |  |  |  |  |
| <b><i>miRNAs, TERT, and TERT mRNA 3'UTR RT-qPCR</i></b>                                    |                      |  |  |                                                                 |  |  |  |  |  |  |  |  |
|                                                                                            |                      |  |  |                                                                 |  |  |  |  |  |  |  |  |
|                                                                                            | miR-1266-5p-F        |  |  | GGTGCCCTCAGGGCTGTAGAACA                                         |  |  |  |  |  |  |  |  |
|                                                                                            | miR-S1-3p-F          |  |  | GGTGCGCTGTTTCATGCCC                                             |  |  |  |  |  |  |  |  |
|                                                                                            | U6-F                 |  |  | CGCTTCGGCAGCACATATAC                                            |  |  |  |  |  |  |  |  |
|                                                                                            | Universal-R          |  |  | CCAGTCTCAGGGTCCGAGGTATTC                                        |  |  |  |  |  |  |  |  |
|                                                                                            | TERT-F               |  |  | CGGTGTGCACCAACATCTAC                                            |  |  |  |  |  |  |  |  |
|                                                                                            | TERT-R               |  |  | TCTTGGCTTTCAGGATGGAG                                            |  |  |  |  |  |  |  |  |
|                                                                                            | TERT 3'UTR-F         |  |  | AAGGACCCTGGGAGCTCTG                                             |  |  |  |  |  |  |  |  |
|                                                                                            | TERT 3'UTR-R         |  |  | CCATCCAGGTGCAGGGTCC                                             |  |  |  |  |  |  |  |  |
|                                                                                            |                      |  |  |                                                                 |  |  |  |  |  |  |  |  |
| <b><i>Reverse transcription for T antigens</i></b>                                         |                      |  |  |                                                                 |  |  |  |  |  |  |  |  |
|                                                                                            |                      |  |  |                                                                 |  |  |  |  |  |  |  |  |
|                                                                                            | Anchor RT primer 2   |  |  | CTGATCTAGAGGTACCGGATCCTTTTTTTTTTTTTTTT                          |  |  |  |  |  |  |  |  |

[illegible]
